1 **Mouse hue and wavelength-specific luminance contrast sensitivity are non-uniform**  
2 **across visual space.**

3

4 Daniel J. Denman\*, Jennifer A. Luviano, Douglas R. Ollerenshaw, Sissy Cross, Derric Williams,  
5 Michael A. Buice, Shawn R. Olsen, R. Clay Reid

6 *Allen Institute for Brain Science. Seattle, WA 98109*

7 *\*for correspondence: danield@alleninstitute.org*

8

9 **Abstract**

10 Mammalian visual behaviors, as well as responses in the neural systems thought to underlie these  
11 behaviors, are driven by luminance and hue contrast. With tools for measuring activity in cell-type  
12 specific populations in the mouse during visual behavior gaining traction, it is important to define the  
13 extent of luminance and hue information that is behaviorally-accessible to the mouse. A non-uniform  
14 distribution of cone opsins in the mouse potentially complicates both luminance and hue sensitivity:  
15 opposing gradients of short (UV-shifted) and middle (blue/green) cone opsins suggest that hue  
16 discrimination and wavelength-specific luminance contrast sensitivity may differ depending on  
17 retinotopic location. Here we ask if, and how well, mice can discriminate color and wavelength-specific  
18 luminance across visuotopic space. We found that mice were able to discriminate hue, and were able  
19 to do so more broadly across visuotopic space than expected from the cone-opsin distribution. We also  
20 found wavelength-band specific differences in luminance sensitivity.

21

## 22 Introduction

23 The mouse visual system is increasingly <sup>1,2</sup> being used as a model system for studying both  
24 cortical sensory processing <sup>3-7</sup> and behavior <sup>8-12</sup>. While most physiological work has used achromatic  
25 stimuli<sup>3,13</sup>, mice, like most other mammals, display physiological color-opponent signals in the retina <sup>14-</sup>  
26 <sup>18</sup>, through LGN <sup>19</sup> and possibly V1 <sup>20</sup>. The mouse retina displays asymmetric and mixed expression of  
27 its two opsins along the dorsal-ventral axis of the retina, creating opposing gradients of short and  
28 middle opsins <sup>21,22</sup> and resulting in gradients of wavelength-band specific responses <sup>16,19,23</sup>. Therefore  
29 the substrate for cone-driven color-opponent signals, and any hue sensitivity, exists only in the  
30 overlapping "opsin transition zone" <sup>15,19</sup>. However, short and middle opsin responses broadly overlap in  
31 V1 and higher visual areas <sup>23</sup> and rod-cone antagonism can also create color opponency in some  
32 mouse retinal ganglion cells <sup>17</sup>, presenting the possibility that behaviorally-relevant color information  
33 could be extracted more broadly across retinotopic space.

34 Whether mice can use hue information to guide visual behavior is an open question. There is  
35 some evidence for hue discrimination <sup>24</sup>, but it remains unclear how this depends on overall luminance,  
36 luminance contrast, or retinotopic position. Further, it is not known if the gradients in opsin distribution  
37 lead to variations in behavioral luminance sensitivity across space. Such non-uniformity would impact  
38 studies of visuotopically extended V1 populations, such as studies of population sparsity <sup>25</sup>, population  
39 correlations <sup>26</sup> and other notions of population coding <sup>10,27</sup>.

40 Here we use a simple behavior, change detection, to determine where in visual space mice can  
41 discriminate changes in hue and luminance at ethologically-relevant (i.e, mesopic) luminance levels. By  
42 measuring detectability of luminance and color changes separately across elevation (spanning ~75°),  
43 we are able to generate an estimate of wavelength-specific contrast sensitivity across visual space.  
44 Mice were able to discriminate hue, but only at elevations above the horizon. We find both wavelength-  
45 specific luminance and hue contrast sensitivity to be dependent on retinotopic location, but that these  
46 differences in sensitivity were less dramatic than expected from the cone opsin distribution, suggesting  
47 behavioral access to differential activation of rods and cones.

48

## 49 Results

### 50 Behavioral Task

51 To examine the psychophysical and physiological basis of mouse color vision, we first trained  
52 mice in a go/no-go change detection task<sup>8</sup> in an immersive visual stimulation environment customized  
53 for delivering stimuli in the spectral bands of the mouse short and middle wavelength opsins (Fig 1A;  
54 *Materials and Methods*). We use the system here to deliver a video stimulus driven by a green and  
55 ultraviolet LED projector; for each point on the stimulus the green and ultraviolet intensity could be  
56 independently modulated. Total luminance was in the mesopic range, over which mice are both  
57 behaviorally active<sup>28</sup> and color opponent signals have been demonstrated in the retina<sup>15,17</sup>. Under this  
58 paradigm, mice indicate that they have perceived a change in the stimulus by licking a reward spout  
59 within 1 second of the change (Figure 1B); subsequent licks allow reward consumption (Figure 1C).

60 Following pre-training on the change detection task (see *Materials and Methods*), we switched to  
61 change detection sessions in which the ultraviolet and green intensity, centered on the mouse short  
62 and middle wavelength bands, respectively, were varied independently on each trial. Each trial  
63 contained a change in intensity for a 15° test circle on a mean luminance background at one of four  
64 elevations: -10°, 10°, 30°, and in some cases 50° (relative to both the horizon and the placement of the  
65 rotating mouse platform). We varied position only along elevation because both rods and cones are  
66 relatively uniform across the azimuthal axis of the retina<sup>29</sup>. Eye position did not change with stimulus  
67 location (Figure 1 – figure supplement 1). To achieve sufficient trials to cover this stimulus space, we  
68 presented a total of 127659 trials (n=4/5 total mice trained, 284 sessions). To control for motivation, we  
69 calculated a running average of the reward rate and selected trials where this reward rate remained  
70 above 4 rewards per minute; only these engaged trials (44%, 56112/127659) were used for analysis.

71

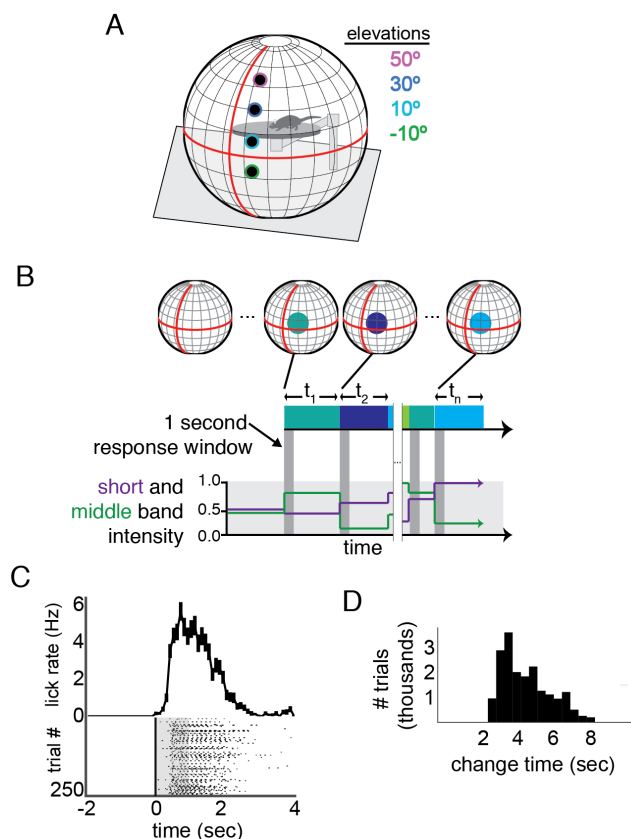

**Figure 1. Change detection task in an immersive visual stimulation environment capable of delivering short- and middle-wavelength band stimulation. A,**

The visual stimulation environment, with the positions and size of stimuli shown; the colored edges were not a part of the presented stimulus, but indicate the color scheme used to denote elevation throughout the other figures. **B,** A schematic of the task. The background was set mean intensity for each wavelength band. At variable times,  $t_n$ , the intensity of short and middle wavelength bands within a 15° diameter circle changed. If the mouse licked within 1 second of this change (indicated by the dark grey boxes), a reward was delivered. Schematic short and middle band intensities are shown on the lower plot and corresponding stimulus changes for each epoch are schematized in blocks and projected as circles onto a sphere. The schematized circles are larger than actual stimuli, for clarity. **C,** Example performance in a single session across 250 trials. Each lick is shown relative to stimulus change; the response window is overlaid in grey. A histogram of lick times is shown above. Error bars are S.E.M. **D,** The distribution of change times ( $t$  in panel **B**) across the trials used for analysis of change detection performance. The distribution follows the log sampling distribution, enforcing roughly equal probability of a change occurring as the mouse continues to wait.

77

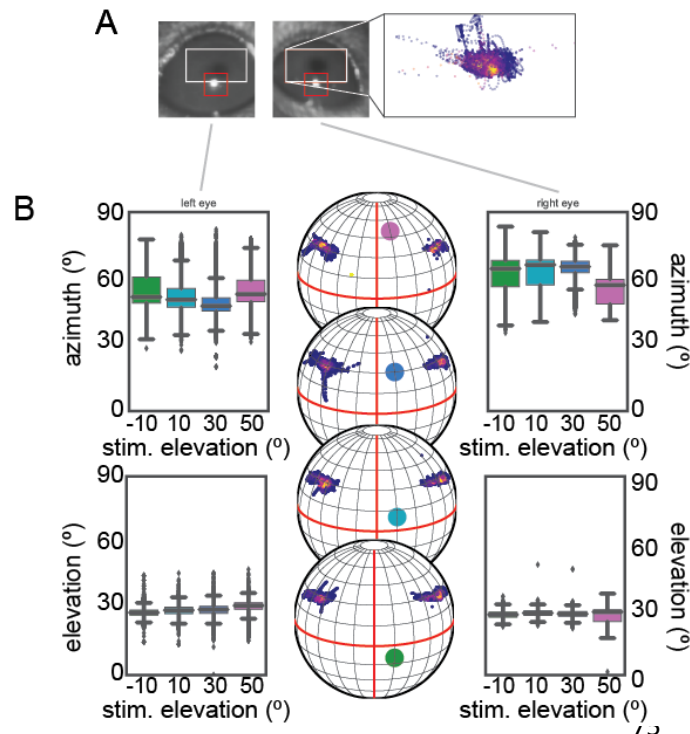

**Figure 1 – figure supplement 1. Eye position during performance of the change detection task at four elevations. A,** Example images from the pupil tracking of the left eye (left) and right eye (right). For both eyes, user specified windows specifying the location of the pupil and corneal reflection are overlaid on the images; for the right eye, the center position of an ellipse fit to the pupil is shown within this box, with the color of each point representing the density of overlapping points. **B,** Eye position across the four elevation conditions. The elevation and azimuth are not statistically different between any pair of conditions ( $p > 0.05$ , t-test).

## 76 Short and middle wavelength band specific contrast sensitivity

77 We first examined our results to estimate the relative luminance contrast sensitivities to short  
78 and middle-wavelength band stimulation across the visual field. Although the green and ultraviolet  
79 projector LEDs nearly isolate responses of the middle and short wavelength sensitive opsins<sup>30</sup>, they do  
80 not necessarily isolate responses of individual cones, most of which express a combination of the two  
81 opsins. Nor is it necessarily a measurement of the relative weight of the cone opsins themselves, as  
82 rods also may contribute to this light sensitivity at these luminance levels. Rather, we present a  
83 measure of the relative perceptual weight to stimuli of the middle and short wavelength bands covered  
84 by our stimulus LEDs (Figure 2 – figure supplement 1), as combined through both cone opsins and  
85 rods.

86 Total luminance change detection saturated by ~30% at all elevations (Fig 2A) and the half-saturation  
87 threshold (hereafter referred to as “threshold”) < 12% for each elevation (Fig 2B). The highest  
88 sensitivity was in the upper visual field, at 5.5% threshold, a threshold that is consistent with previous  
89 reports for a 15° (~0.07 cyc/°) stimulus<sup>8,31–33</sup>. Sensitivity to increments in contrast was similar for all  
90 elevations (10.5–12.1%). Consistent with previous physiological measurements in V1 of mouse<sup>20</sup> and  
91 other species<sup>34,35</sup>, sensitivity to decrements in contrast was higher than sensitivity to increments (5.4% -  
92 10.4%). Notably, this was most pronounced in the upper visual field (difference: 5%) than the lower  
93 visual field (difference: 1.3%).

94 To determine the independent contributions of short and middle wavelength bands we  
95 examined change trials that contained increments or decrements of only one of the two LEDs. For the  
96 short wavelength band (i.e. UV), contrast sensitivity was non-uniform, with the highest sensitivity in the  
97 upper visual field (Fig 2C,D; 8% threshold). As with total luminance, mice were more sensitive to  
98 decrements than increments in contrast. The non-uniformity across elevation was more pronounced for  
99 short-wavelength specific sensitivity than total luminance, but was restricted to decrements. The  
100 middle-wavelength (i.e. blue/green) luminance contrast sensitivity was also non-uniform, across  
101 elevation, but with the opposite relationship as the short wavelength and total luminance. The middle-

102 wavelength (i.e. green) luminance contrast  
 103 sensitivity was nearly identical across the  
 104 tested positions (Fig 2E-F). Middle-  
 105 wavelength sensitivity was very similar for  
 106 increments and decrements, again in  
 107 contrast to total and short-wavelength  
 108 luminance contrast sensitivity. In summary,  
 109 we found that luminance contrast sensitivity  
 110 was non-uniform, with significant opposing  
 111 wavelength-band specific non-uniformities,  
 112 though less than what would be predicted  
 113 from the opsin expression or photoreceptor  
 114 response alone.

115

116 **Determination of relative short and**  
 117 **middle wavelength band contributions at**  
 118 **several retinotopic locations and**  
 119 **comparison with predicted cone weights.**

120 We next determined the relative  
 121 strength of short and middle-wavelength  
 122 stimulation across the visual field. Despite  
 123 the measurements of the cone gradients  
 124 and non-uniformity in V1 response<sup>23</sup>, we  
 125 were uncertain about the relative  
 126 contributions of rods and cones at the  
 127 tested light levels (i.e., relative contributions  
 128 of the rod and middle opsin to middle band  
 129 stimulation), so we first determined which  
 130 combinations of wavelength band activation  
 131 effectively opposed each other at each  
 132 elevation.

133 Our approach is schematized Figure  
 134 3A: for equally weighted contributions, equal  
 135 but opposite changes in the strength of the  
 136 LED on the same trial should oppose each  
 137 other and lead to chance change detection  
 138 performance; deviations from opposing  
 139 luminance changes generate luminance  
 140 contrast and high detectability performance  
 141 (deviations from the major axis of the  
 142 ellipse). The slope of the major axis of this ellipse, hereafter called the “equiluminant line”, indicates the  
 143 relative weight of each luminance band. A slope of 1 lies on the unity and equal short and middle-band  
 144 weight (Figure 3A, left); slopes > 1 indicate middle band domination (Figure 3A, right) and < 1 short  
 145 band domination. In setting up the visual stimulation we attempted to adjust the projector LEDs to  
 146 match the strengths of short and middle band activation using published retinal sensitivities<sup>36</sup>; if this  
 147 were successful, we expected the axis of opposition to closely match unity.

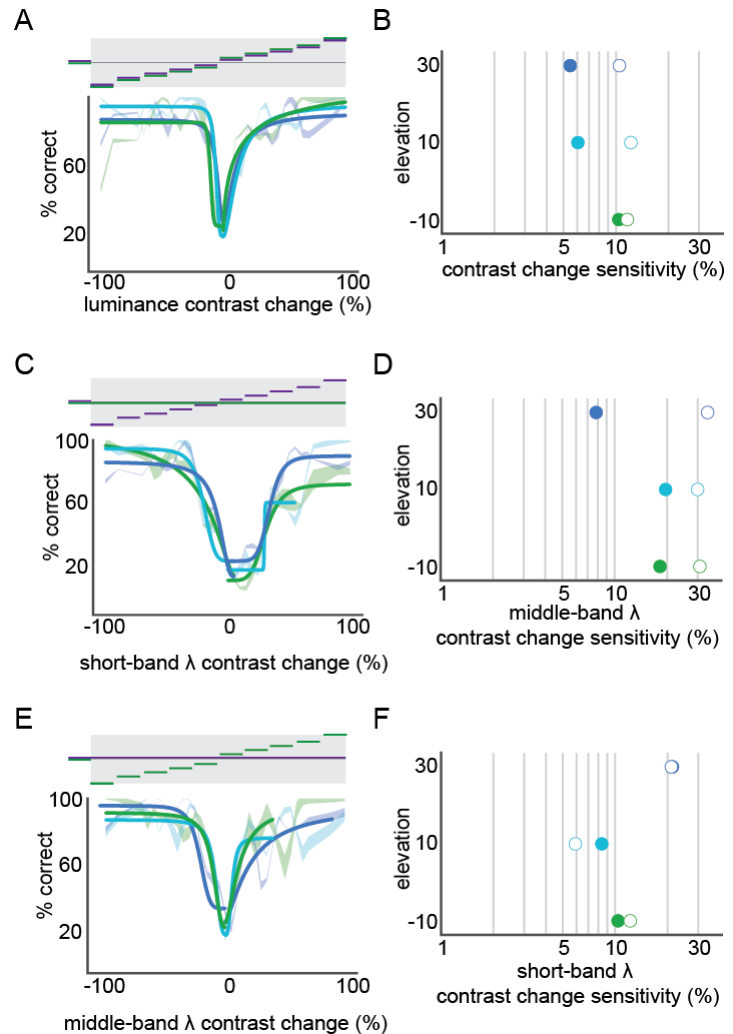

**Figure 2. Short and middle wavelength band specific contrast sensitivity.** **A**, Performance of luminance contrast change detection at three elevations (green lines: -10°, light blue lines: 10°, dark blue lines: 30°). For each elevation, a fit with hyperbolic ratio function is shown overlaid on mean performance; mean performance line thickness shows S.E.M. across mice. The stimulus is schematized above the performance, showing the corresponding relative change in each wavelength band for each condition. **B**, Contrast sensitivity at each elevation, from the fits in panel A. **C,D**, short-band specific luminance contrast performance across elevation, as in panels A,B. **E,F**, middle-band specific luminance contrast performance across elevation, as in panels A,B.

148 We measured the axis along which opposite changes in short  
149 and middle wavelength stimulation effectively canceled each  
150 other at several elevations. The performance across pairwise  
151 combinations of changes in short and middle band luminance  
152 (Figure 3B) was fit with an ellipse (Figure 3C, top), and the  
153 major axis of this ellipse was taken to be the equiluminance  
154 line (Figure 3C, bottom). We found the mouse to be more  
155 sensitive to middle band stimulation than expected at all  
156 elevations tested, including at 30° where given the eye  
157 positioning (Figure 1 – figure supplement 1) short-opsin  
158 expression dominates. In fact, surprisingly, the mice were  
159 more sensitive to middle than short-band changes at all  
160 elevations, with the following middle/short ratios: 3.4, 3.6, and  
161 2.25 at –10°, 10°, and 30°, respectively.

162 We compared our measure of the wavelength-band  
163 specific perceptual contributions to predictions from the cone  
164 expression distribution, the cone functional response, and  
165 intrinsic imaging of the mouse visual system<sup>15,23</sup>. By projecting  
166<sup>29</sup> the spatial profile of cones into visuotopic coordinates based  
167 on the mean eye position during our experiments (Figure 1 –  
168 figure supplement 1), we computed expected middle/short  
169 ratios for each of the elevations we tested (Figure 3 – figure  
170 supplement 1). Similar to the estimated relative opsin weights  
171 across V1 under photopic conditions<sup>23,37</sup>, 2.3, 0.81, 0.81, the  
172 cone functional distribution predicts 2.3, 1.0, and 0.44 at –10°,  
173 10°, and 30°, respectively; both predict far less middle-band  
174 sensitivity that we observed. This result suggests that rod  
175 opsin sensitivity contributes significantly to mouse perceptual  
176 sensitivity at these light levels, at least as much as 60%  
177 (Figure 3 – figure supplement 1) at higher elevations.

178

### 179 Can mice discriminate hue?

180 We continued to ask if mice could report a change in  
181 hue independent of any luminance change. Instead of explicitly  
182 creating a device that normalized total luminance during hue  
183 changes<sup>38–40</sup>, we presented sufficient combinations of  
184 wavelength-band specific luminance changes to experimentally  
185 determine when hue changes occurred independent of  
186 luminance changes. We start with the assumption that no  
187 change in luminance or hue contrast is not discriminable to the  
188 observer. All luminance and hue contrast changes that are  
189 behaviorally indistinguishable from this "no change" condition form an ellipse of non-discriminability in hue-luminance space analogous to a MacAdam ellipse of non-discriminability in color space<sup>38</sup>. As noted above, the axes of this ellipse that more closely matches the stimulus "luminance-balanced" line (Figure 3A, unity line) specifies this equiluminance line for the wavelength band sensitivities at that elevation; because mice are more sensitive to luminance than hue contrast, this was always the major axis of the ellipse (Figure 3A, purple ellipses). In an HSL color model, this line is equivalent to that of

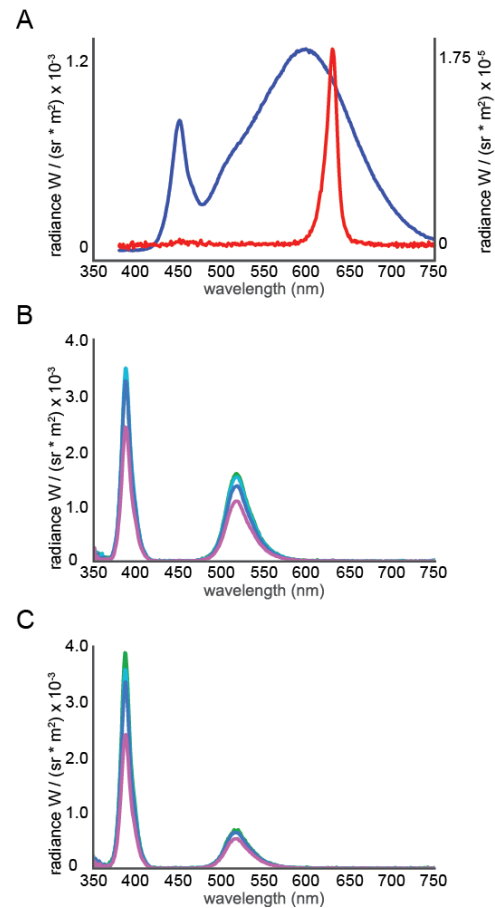

**Figure 2 – figure supplement 1. Spectral radiance of various illumination sources from 350 – 750nm. A,** The spectral radiance of the lighting in the Allen Institute animal housing facility, including the behavioral testing suite during lights on (blue line, left axes) and lights off (red line, right axes) conditions. Note the lack of any irradiance below 400nm. **B,** The spectral radiance off of the stimulation dome at each elevation for equal short and middle LED drive **C,** The spectral radiance off of the stimulation dome at each elevation after adjustment for wavelength-band specific non-uniformity.

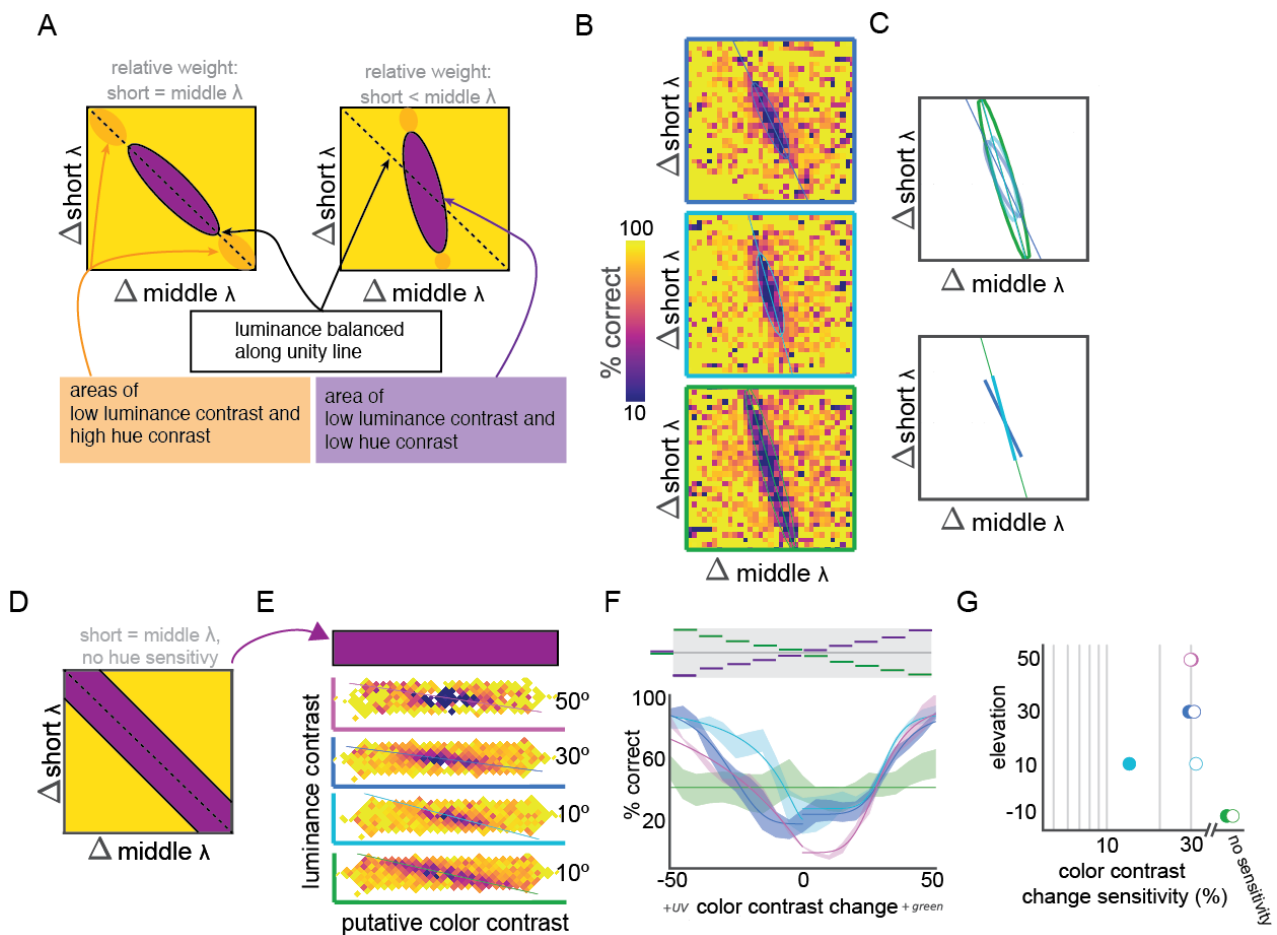

**Figure 3. Relative short and middle-wavelength band weights and hue discrimination across elevation.**

**A**, Schematic representation of two possible relative short and middle band weight scenarios, with putative hue contrast sensitivity. The left scenario shows equal weight of short and middle bands, leading in balanced sensitivity and chance performance to equal and opposite changes in short and middle band contrast, along the unity line. The right scenario shows higher middle band sensitivity, resulting in a positive shift of the slope, where the larger changes in short band contrast are required to balance changes in middle band contrast. For both scenarios low luminance and hue contrast should yield to low change detection performance (purple ellipses). If hue discrimination occurs along the major axis of this purple ellipse, and should be high near the edges (orange ellipses). **B**, Observed relative weights of short and middle band weights, as in panel A., at elevations of  $-10^\circ$  (green outline, bottom),  $10^\circ$  (light blue outline, middle), and  $30^\circ$  (dark blue outline, top). **C**, Fit of the relative weights in panel B with two-dimensional Gaussians, including a plot of the major axis of the fit. These major axes are isolated in the plot below. Color corresponds to stimulus elevation (green lines:  $-10^\circ$ , light blue lines:  $10^\circ$ , dark blue lines:  $30^\circ$ ). **D**, schematic of sensitivity testing after attempted compensation for relative short and middle band weight. The central region should be along the line of equiluminance, so subsequent testing was focused there (arrow to panel E). **E**., Performance of change detection at four elevations (green lines:  $-10^\circ$ , light blue lines:  $10^\circ$ , dark blue lines:  $30^\circ$ , pink lines:  $50^\circ$ ) after attempted balancing of short and middle weights. Because short and middle weight were not exactly balanced, performance was fit with a two-dimensional Gaussian and hue sensitivity measured along the major axis. **F**, Hue sensitivity at each elevation. Fit with hyperbolic ration function is shown overlaid on mean performance; mean performance line thickness shows S.E.M. across mice. The stimulus is schematized above the performance, showing the corresponding equal and opposite relative change in each wavelength band for each condition. **G**, Contrast sensitivity at each elevation, from fits in panel F.

195 constant saturation and lightness but varying hue; it is also analogous to a slice through the  
 196 equiluminant plane in a DKL color space<sup>41</sup>. Because of the shift short versus middle contributions



197 across space, this equiluminance line changes with elevation (Fig 3C), so we attempted to create  
198 conditions of uniform luminance contrast across elevation by adjusting for the relative short and middle-  
199 band sensitivities (Figure 3D). By examining change detection performance along this experimentally  
200 defined axis of hue change, we can ask if mice can discriminate hue independent of luminance (Figure  
201 3A, orange ellipses).

202 We found hue discrimination to depend on elevation. Examining the luminance-adjusted data,  
203 we found hue discrimination was negligible at  $-10^\circ$ , but mice were capable of varying levels of hue  
204 sensitivity at all other elevations tested (Fig 3F). The performance along the equiluminant line at  $-10^\circ$   
205 was not well fit by a hyperbolic ratio function, and the performance in catch trials (0% contrast change)  
206 was not significantly different from any point along the line ( $p > .05$ , student's t-test). We were able to fit  
207 the performance at each of the other elevations tested, up to  $50^\circ$  above the horizon. Hue contrast  
208 sensitivity was highest at for decrements in short-middle opponency at  $10^\circ$  elevation (13.4%); hue  
209 sensitivity was nearly identical for decrements in short-middle opponent contrast at  $30$  and  $50^\circ$  and for  
210 increments at all elevations above the horizon (29.3 – 32.1%).

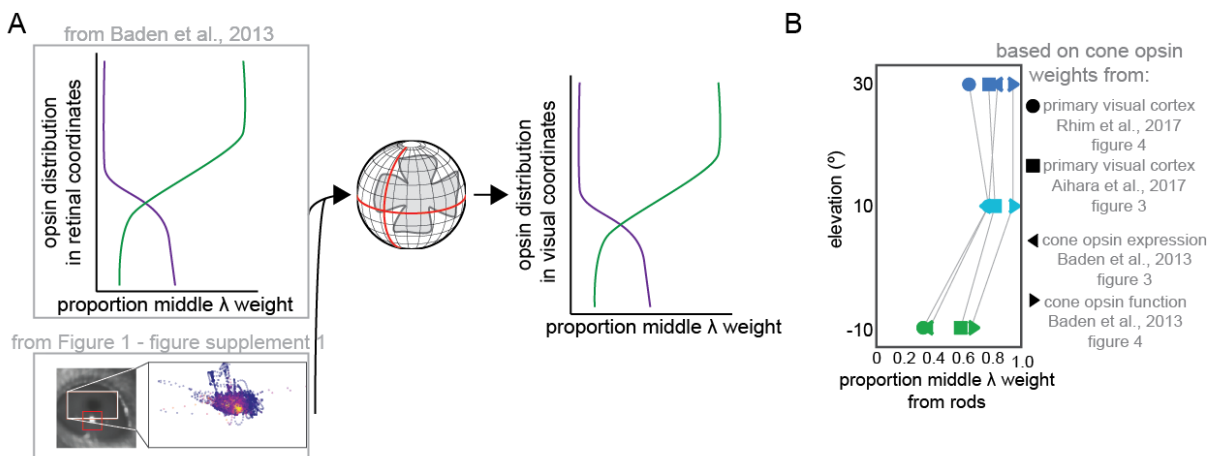

**Figure 3 – figure supplement 1. Estimating short and middle cone weights in the coordinates of our behavioral apparatus from retinal expression and functional data. A,**

To generate predictions of the relative weights of each wavelength band at each elevation tested in our paradigm, we projected retinal spatial distributions of both opsin expression and functional responses, both from Baden et al., 2013, into spherical coordinates according to the eye position measured in Figure 2 – figure supplement 1. **B,** normalized difference between the predicted (cone opsin expression, cone opsin functional response, V1 response) and observed behavioral weights, for  $-10^\circ$ ,  $10$ , and  $30^\circ$ . The difference between the behavior middle/short ratio at each elevation and the middle/short ratios at those elevation predicted by several measures of cone opsin weight in the literature was divided by the observed ratio to estimate the proportion of the middle band weight provided by rods under our behavioral luminance conditions

## 212 Discussion

213 The finding that both wavelength-specific luminance (Figure 2) and hue contrast (Figure 3E-F) is  
214 not uniform is in accordance with the distributions of both retinal and primary visual cortical <sup>23</sup>  
215 responses; however, we found that middle-band sensitivity was both higher and more uniform than  
216 expected (Figure 2). This suggests that rod sensitivity contributes significantly to perceptual sensitivity  
217 at these light levels (Figure 3 – figure supplement 1).

218 This finding may be important for studies of the mouse visual system that use visuotopically  
219 extended stimulation<sup>10,25,42–44</sup>, especially those that measure the underlying population representation of  
220 the stimuli. Because the spatial scale of luminance and contrast adaptation can be large <sup>45</sup>, the  
221 adaptation to large single-band stimuli (such as those produced by LCD or other sRGB displays) in  
222 these studies may underestimate the contrast sensitivity for cells in upper visual field. This spatial scale  
223 is especially relevant because of the scale of mouse vision – 50% differences can be seen across a  
224 small number (~5) receptive field diameters.

225 Our results also demonstrate that hue sensitivity depends on retinotopy, and that some  
226 retinotopic locations appear to not support hue discrimination. A goal of many large-scale data  
227 collection efforts, both completed <sup>18</sup> and underway (brain-map.org/visualcoding) as well as smaller-  
228 scale surveys <sup>3,13,46,47</sup> from retina to V1 is the classification or clustering of response properties in order  
229 to define functional channels. Because color-opponent cells, both single and double<sup>48</sup>, are thought to  
230 underlie such behavior, our findings indicate that mice may have at least one, likely at least two, color-  
231 opponent cell types; the presence of such functional cell types may depend strongly on retinotopy.  
232 Notably, our animals are housed in an environment with fluorescent lighting that does not provide UV-B  
233 for reflection (Figure 2 – figure supplement 1), suggesting that the behavior we observed is  
234 developmentally specified, not learned, and not lost through lack of use.

235 Mice, while often considered nocturnal <sup>49</sup>, can be behaviorally active across a range of  
236 luminance conditions; C57BL/6 mice in particular can shift between diurnal, crepuscular, and nocturnal  
237 behavioral patterns over the course of the year <sup>28</sup>. Previous studies on color signaling in the mouse  
238 have offered several hypotheses for the ethological uses of color signals. Our results are consistent  
239 with the hypothesis<sup>15</sup> that non-uniform wavelength-specific sensitivity is matched to the luminance  
240 statistics of natural scenes (UV in the upper visual field, green in the lower), and high sensitivity to  
241 decrements in the short wavelengths may be particularly helpful during the shift towards UV in the  
242 spectral radiance distribution the during twilight hours <sup>50</sup>. Another hypothesis, that short-middle  
243 opponency is useful for identifying mouse urine posts<sup>17</sup>, is inconsistent with our demonstration of a lack  
244 of hue discrimination at -10°, at least in absence of significant excursions in eye position or head  
245 movements. Our results suggest that, under the mesopic condition during which mice are often active,  
246 hue signals may be mediated by rod-cone opponency, and this may facilitate the specialization of cone  
247 opsin distributions for sampling natural luminance statistics <sup>15,51</sup>.

248

## 249 **Methods**

250 All procedures are approved by the Allen Institute for Brain Science Institutional Animal Care and Use  
251 Committee.

### 252 *Animals and Surgical Preparation*

253 All animals used in this study (n=5) were C57Bl/6J male mice aged 30-300 days obtained from  
254 The Jackson Laboratories. To fix the animal's head within the behavioral apparatus, a single surgery to  
255 permanently attach a headpost was performed. During this surgery, the animal was deeply  
256 anesthetized with 5% isoflurane and anesthesia maintained throughout the surgery with 1.5-2%  
257 continuous inhaled isoflurane. The mouse was secured in a stereotax with ear bars; hair was removed  
258 and the exposed skin sterilized with three rounds of betadine. An anterior-posterior incision was made  
259 in the skin from anterior of the eyes to posterior of the ears. The skin was removed in a tear drop shape  
260 exposing the skull. The skull was leveled and the headpost was placed using a custom stereotaxic  
261 headpost placement jig. A custom 11 mm diameter metal headpost with mounting wings was affixed to  
262 the skull using dental cement. The exposed skull inside the headpost was covered with a thin protective  
263 layer of clear dental cement and further covered with Kwikcast. The animal was allowed to recover for  
264 at least 5 days prior to the initiation of behavioral training.

265 After headpost implantation animals were kept on a reverse light cycle (lights OFF from 9AM to  
266 9PM) and behavioral testing was done between 9AM and 1PM. Mice were habituated to handling  
267 gradually, through sessions of increasing duration. Mice were also habituated to the behavioral  
268 apparatus, first by allowing periods of free exploration and subsequently with head fixation sessions  
269 increasing from 10 minutes to 1 hour over the course of 1 week. Water restriction began with  
270 habituation; all mice were maintained at 85% of the original body weight for the duration of training and  
271 testing.

272

### 273 *Stimulus Environment and Stimuli*

274 Ultraviolet and human-visible stimuli were provided across a range of retinotopic locations using  
275 a custom spherical stimulus enclosure<sup>19</sup> (Figure 1A, Fig 2- figure supplement 1). A custom DLP-  
276 projector designed for the mouse visual system provided independent spatiotemporal modulation of  
277 ultraviolet (peak 380nm, Figure 1B) and green (peak 532nm, Fig 1B) light. The projection system  
278 operated at 1024x768 pixel resolution and a refresh rate of 60Hz, achieving a maximum intensity of ~3  
279 cd/m<sup>2</sup>. Planar stimuli were spatially warped according to a custom fisheye warp for presentation on a  
280 curved screen; the fisheye warp was created through an iterative mapping protocol using the  
281 meshmapper utility (<http://paulbourke.net/dome/meshmapper/>) calibrated on the behavioral  
282 environment to achieve maximal accuracy.

283 Stimuli were presented in the right visual field and consisted of 15° diameter circles of varying  
284 color on a mean intensity background using custom written software extensions of the PsychoPy  
285 package (<http://www.psychopy.org>). The background intensity was 1.52 cd/m<sup>2</sup>. For some testing  
286 sessions, the color of the display was adjusted to match the mouse's spectral sensitivity in order to  
287 create uniform and balanced sensitivity to the projector's LED sources across the visual stimulus  
288 enclosure. To do so, a custom warp was applied that included a spatially dependent adjustment of the  
289 intensity of each LED (near-UV and 'green'), according to the results shown in Figure 3C.

290 Animals were head-fixed on a freely rotating disc in the center of the spherical enclosure and  
291 allowed to run freely during the course of training and testing. A lick spout was positioned  
292 approximately 0.5 cm in front of the mouse within range of tongue extension.

293 In some experiments, infrared short-pass dichroic mirrors (750nm short-pass filter, [Edmund](#)  
294 [Optics](#)) were placed in front of each eye to allow for video tracking of the pupil. Cameras (Mako and  
295 Manta, AVT technologies) placed behind the animal were aligned to record a reflected image of the  
296 pupil; infrared illumination and a reference corneal reflection was provided via an LED positioned near  
297 the camera. Movies of the eye position during presentation of the stimuli used in the task was acquired  
298 at  $\geq 60$ Hz, with the eye occupying  $>60\%$  of the image at 300 x 300. Data from these sessions were not  
299 included in the performance analysis to avoid any potential artifact caused by the infrared dichroic.

300

### 301 *Behavioral Task*

302 Animals were first shaped to associate changes in luminance with a reward. After each change  
303 in luminance a water reward was automatically delivered, regardless of mouse licking behavior. During  
304 these sessions, the reward was constant at 10 $\mu$ L. Incorrect licks were punished by resetting the trial,  
305 such that the mouse had to wait longer for the next change. This “shaping” phase lasted a minimum of  
306 two days, but for most mice extended to several weeks. For some animals (2/5), subsequent epochs of  
307 this automatic reward shaping served as task reinforcement when performance in testing blocks  
308 dropped.

309 During each testing session a circle was presented at a single visuotopic location and remained  
310 at this location for the duration of the session. At non-regular intervals, again selected from an  
311 exponential distribution, the color and/or luminance of the stimulus was changed, and the mouse had to  
312 report detection of change by licking the reward spout within 1 second of the change in order to receive  
313 reward (Figure 1C). Licks were detected through a capacitive sensor connected to the reward spout.  
314 No water was present on the reward spout before the first lick; if the animal correctly detected a  
315 change, a water reward (3-10 $\mu$ L, depending on animal and stage of training) was delivered through this  
316 spout (Figure 1D). Sessions were 50-60 minutes and typically included ~300 trials.

317 Mice were first trained to associate changes in a 15° stimulus at 100% luminance contrast with  
318 a reward. In these sessions (total of 3 to 25 sessions), the contrast of a stimulus (10° elevation, relative  
319 to the horizon) changed at exponentially distributed intervals from 50% positive relative to the  
320 background to 50% negative (from white to black), or vice versa (black to white). If a lick occurred  
321 within 1 second of an actual stimulus change (Figure 1B), a reward was delivered to the spout and  
322 liquid reward was consumed subsequent licks (Figure 1C). If a lick occurred outside of this window the  
323 trial was aborted, extending the time the mouse must wait and effectively creating a ‘time-out’ period.  
324 Mice advanced from this protocol after performance exceeded 75% for consecutive sessions.

325 In subsequent testing sessions, the intensity of the ultraviolet and green intensities were varied  
326 independently on each trial. Each trial contained a change in LED intensity for a 15° test circle on a  
327 mean luminance background at one of four elevations: -10°, 10°, 30°, and in some cases 50°. The first  
328 8-20 trials of each session were 100% contrast changes, as described for the training blocks, with  
329 rewards automatically delivered. The number of these daily “free” rewards was reduced to 8 for as long  
330 as the mouse received  $>1.0$ mL of reward during training or performed well enough to reach satiety and  
331 disengage from the task. We attempted to correct for sessions with poor performance by increasing  
332 these “free” rewards on subsequent days before gradually reducing them again. To control for  
333 motivation in the results, we calculated a running average of the reward rate and selected trials where  
334 this reward rate remained above 4 rewards per minute; only these engaged trials (44%, 56112/127659)  
335 were used for analysis.

336

### 337 *Analysis*

338 All analyses were done using Python and common scientific packages (numpy, scipy,  
339 matplotlib, and pandas). Code is publicly available from [github.com/danieljdenman/mouse\\_chromatic](https://github.com/danieljdenman/mouse_chromatic)  
340 and includes a Jupyter notebook that contains code for generation of our figures from the data. Data  
341 from each training session was saved and combined into a common data structure that was used for all  
342 analysis. Individual sessions were analyzed to drive adjustments in the training parameters such as the  
343 number of automatic “free” rewards. Following data collection for all animals, all sessions were loaded  
344 into a single object for analysis. This data structure can be recreated from the NWB<sup>52</sup> files made  
345 available from [github.com/danieljdenman/mouse\\_chromatic](https://github.com/danieljdenman/mouse_chromatic).

346 To quantify performance, from each trial the following parameters were extracted: change times  
347 (the time of stimulus change), lick times (the time of each lick, as detected through the capacitive  
348 sensor connected to the reward spout), and the stimulus conditions. A trial was scored “correct” if the  
349 first lick after a change time occurred within one second, and if there was actually change in intensity of  
350 either green or ultraviolet at that change time.

351 For each mouse, the percent correct was computed for each pair of LED state transitions, i.e.,  
352 each pairwise combination of change in short-band luminance and change in middle-band luminance  
353 (e.g., Fig 3C). For each mouse, performance was ignored if 3 trials were not presented for those  
354 conditions. For fitting, missing data were replaced via a nearest neighbors approach, with the mean of  
355 the surrounding data. Our sampling strategies focused on the areas of changing performance, ensuring  
356 that cases of missing data were limited to the areas where performance had saturated at or near the  
357 lapse rate. Psychophysical curves for wavelength band-specific and hue sensitivity were taken from the  
358 appropriate slices of this color space. Sensitivity was taken from the c50 parameter of fit a hyperbolic  
359 ratio fit<sup>53</sup>.

360 A total of 5 mice entered training on the task; one mouse failed to reach consecutive sessions of  
361 75% performance during the initial high luminance contrast change detection phase, and so did not  
362 continue to testing in the hue contrast discrimination phase. We did not use any statistical methods to  
363 determine mouse or trial sample size prior to the study, determining based on stability and consistency  
364 of results when sufficient samples had been collected. Statistical tests were student’s t-test unless  
365 otherwise specified.

366 Eyetracking analysis was done via a semi-automated algorithm; full details are available from  
367 <http://help.brain-map.org/display/observatory/Documentation>. Briefly, the algorithm fits an ellipse to  
368 the pupil or corneal reflection (CR) area, respectively. A seed point is identified by convolution with a  
369 black square (for the pupil) and white square (for the corneal reflection). An ellipse was fit to candidate  
370 boundary points identified using ray tracing using a random sample consensus algorithm. The fit  
371 parameters were first reported in coordinate centered on the mouse eye, and subsequently converted  
372 to visual degrees by projection based on the position of the dichroic mirror and the relative position of  
373 pupil and corneal reflection. Coordinates for eye position were extracted independently for each frame  
374 of the eye position movie.

## 375 References

- 376 1. Priebe, N. J. & McGee, A. W. Mouse vision as a gateway for understanding how experience  
377 shapes neural circuits. *Front. Neural Circuits* **8**, 123 (2014).
- 378 2. Baker, M. Through the eyes of a mouse. *Nature* **502**, 156–158 (2013).
- 379 3. Niell, C. M. & Stryker, M. P. Highly Selective Receptive Fields in Mouse Visual Cortex. **28**, 7520–  
380 7536 (2008).
- 381 4. Niell, C. M. & Stryker, M. P. Modulation of Visual Responses by Behavioral State in Mouse  
382 Visual Cortex. *Neuron* **65**, 472–479 (2010).
- 383 5. Wang, Q., Gao, E. & Burkhalter, A. Gateways of Ventral and Dorsal Streams in Mouse Visual  
384 Cortex. *J. Neurosci.* **31**, 1905–1918 (2011).
- 385 6. Glickfeld, L. L., Andermann, M. L., Bonin, V. & Reid, R. C. Cortico-cortical projections in mouse  
386 visual cortex are functionally target specific. *Nat. Neurosci.* **16**, 219–26 (2013).
- 387 7. Glickfeld, L. L., Reid, R. C. & Andermann, M. L. A mouse model of higher visual cortical function.  
388 *Curr. Opin. Neurobiol.* **24**, 28–33 (2014).
- 389 8. Histed, M. H., Carvalho, L. A. & Maunsell, J. H. R. Psychophysical measurement of contrast  
390 sensitivity in the behaving mouse. *J. Neurophysiol.* **107**, 758–765 (2012).
- 391 9. Hoy, J. L., Yavorska, I., Wehr, M. & Niell, C. M. Vision Drives Accurate Approach Behavior  
392 during Prey Capture in Laboratory Mice. *Curr. Biol.* **26**, 3046–3052 (2016).
- 393 10. Montijn, J. S., Goltstein, P. M. & Pennartz, C. M. Mouse V1 population correlates of visual  
394 detection rely on heterogeneity within neuronal response patterns. *Elife* **4**, 1–31 (2015).
- 395 11. Harvey, C. D., Coen, P. & Tank, D. W. Choice-specific sequences in parietal cortex during a  
396 virtual-navigation decision task. *Nature* **484**, 62–68 (2012).
- 397 12. Busse, L., Ayaz, A., Dhruv., N.T., Katzner S., Saleem., A.B., Scholvinck M.L., Zaharia, A.D.,  
398 Carandini, M. The Detection of Visual Contrast in the Behaving Mouse. *J. Neurosci.* **31**, 11351–  
399 11361 (2011).
- 400 13. Durand, S. *et al.* A Comparison of Visual Response Properties in the Lateral Geniculate Nucleus  
401 and Primary Visual Cortex of Awake and Anesthetized Mice. *J. Neurosci.* **36**, 12144–12156  
402 (2016).
- 403 14. Breuninger, T., Puller, C., Haverkamp, S. & Euler, T. Chromatic Bipolar Cell Pathways in the  
404 Mouse Retina. *J. Neurosci.* **31**, 6504–6517 (2011).
- 405 15. Baden, T. *et al.* A tale of two retinal domains: Near-Optimal sampling of achromatic contrasts in  
406 natural scenes through asymmetric photoreceptor distribution. *Neuron* **80**, 1206–1217 (2013).
- 407 16. Chang, L., Breuninger, T. & Euler, T. Chromatic Coding from Cone-type Unselective Circuits in  
408 the Mouse Retina. *Neuron* **77**, 559–571 (2013).
- 409 17. Joesch, M. & Meister, M. A neuronal circuit for colour vision based on rod–cone opponency.  
410 *Nature* **532**, 236–239 (2016).
- 411 18. Baden, T. *et al.* The functional diversity of retinal ganglion cells in the mouse. *Nature* (2016).  
412 doi:10.1038/nature16468
- 413 19. Denman, D. J., Siegle, J. H., Koch, C., Reid, R. C. & Blanche, T. J. Spatial organization of  
414 chromatic pathways in the mouse dorsal lateral geniculate nucleus. *J. Neurosci.* **37**, 1102–1116  
415 (2017).

- 416 20. Tan, Z., Sun, W., Chen, T.-W., Kim, D. & Ji, N. Neuronal Representation of Ultraviolet Visual  
417 Stimuli in Mouse Primary Visual Cortex. *Sci. Rep.* **5**, 12597 (2015).
- 418 21. Applebury, M. L. *et al.* The murine cone photoreceptor: a single cone type expresses both S and  
419 M opsins with retinal spatial patterning. *Neuron* **27**, 513–523 (2000).
- 420 22. Wang, Y. V., Weick, M. & Demb, J. B. Spectral and temporal sensitivity of cone-mediated  
421 responses in mouse retinal ganglion cells. *J. Neurosci.* **31**, 7670–7681 (2011).
- 422 23. Rhim, I., Coello-Reyes, G., Ko, H.-K. & Nauhaus, I. Maps of cone opsin input to mouse V1 and  
423 higher visual areas. *J. Neurophysiol.* jn.00849.2016 (2017). doi:10.1152/jn.00849.2016
- 424 24. Jacobs, G. H., Williams, G. A. & Fenwick, J. A. Influence of cone pigment coexpression on  
425 spectral sensitivity and color vision in the mouse. *Vision Res.* **44**, 1615–1622 (2004).
- 426 25. Froudarakis, E. *et al.* Population code in mouse V1 facilitates readout of natural scenes through  
427 increased sparseness. *Nat. Neurosci.* **17**, 851–7 (2014).
- 428 26. Montijn, J. S., Meijer, G. T., Lansink, C. S. & Pennartz, C. M. A. Population-Level Neural Codes  
429 Are Robust to Single-Neuron Variability from a Multidimensional Coding Perspective Population-  
430 Level Neural Codes Are Robust to Single-Neuron Variability from a Multidimensional Coding  
431 Perspective. *CellReports* **16**, 2486–2498 (2016).
- 432 27. Okun, M., Steinmetz, N.A., Cossel, L., Florencia Iacaru, M., Ko, H., Batho, P., Moore, T., Hofer,  
433 S.B., Mrcic-Flogel, T.D., Carandini, M., & Harris K.D., Diverse coupling of neurons to populations  
434 in sensory cortex. *Nature* **521**, 511–515 (2015).
- 435 28. Daan, S. Spoelstra, K., Albrecht, U., Schmutz, I., Daan, M., Daan, B., Rienks, F., Poletaeva, I.,  
436 Dell’Omo, G., Vyssotski, A., & Lipp, H-P. Lab mice in the field: unorthodox daily activity and  
437 effects of a dysfunctional circadian clock allele. *J. Biol. Rhythms* **26**, 118–129 (2011).
- 438 29. Sterratt, D. C., Lyngholm, D., Willshaw, D. J. & Thompson, I. D. Standard Anatomical and Visual  
439 Space for the Mouse Retina: Computational Reconstruction and Transformation of Flattened  
440 Retinae with the Retistruct Package. *PLoS Comput. Biol.* (2013).  
441 doi:10.1371/journal.pcbi.1002921
- 442 30. Estévez, O. & Spekreijse, H. The ‘silent substitution’ method in visual research. *Vision Res.* **22**,  
443 681–691 (1982).
- 444 31. Sinex, D. G., Burd, L. J. & Pearlman, A. L. A Psychophysical Investigation of Spatial Vision in the  
445 Normal and Reeler Mutant Mouse. *Vision Res.* **19**, 853–857 (1979).
- 446 32. Prusky, G. T., West, P. W. & Douglas, R. M. Behavioral assessment of visual acuity in mice and  
447 rats. *Vision Res.* **40**, 2201–2209 (2000).
- 448 33. Umino, Y., Solessio, E. & Barlow, R. B. Speed, spatial, and temporal tuning of rod and cone  
449 vision in mouse. *J Neurosci* **28**, 189–198 (2008).
- 450 34. Wang, Y., Jin, J., Kremkow, J., Lashgari, R., Komban, S.J., & Alonso, J.M. Columnar  
451 organization of spatial phase in visual cortex. *Nat. Neurosci.* **18**, 97–103 (2015).
- 452 35. Kremkow, J., Jin, J., Wang, Y. & Alonso, J. M. Principles underlying sensory map topography in  
453 primary visual cortex. *Nature* **533**, 52–7 (2016).
- 454 36. Lyubarsky, A. L., Falsini, B., Pennesi, M. E., Valentini, P. & Pugh, E. N. UV- and midwave-  
455 sensitive cone-driven retinal responses of the mouse: a possible phenotype for coexpression of  
456 cone photopigments. *J. Neurosci.* **19**, 442–455 (1999).
- 457 37. Aihara, S., Yoshida, T., Hashimoto, T. & Ohki, K. Color Representation Is Retinotopically Biased  
458 but Locally Intermingled in Mouse V1. *Front. Neural Circuits* **11**, 1–12 (2017).

- 459 38. MacAdam, D. L. Visual Sensitivities to Color Differences in Daylight. *J. Opt. Soc. Am.* **32**, 247  
460 (1942).
- 461 39. Wyszecki, G. & Stiles, W. *Color Science: Concepts and Methods, Quantitative Data and*  
462 *Formulae*. (John Wiley & Sons, 1982).
- 463 40. Gagin, G., Bohon, K.S., Butensky, A., Gates, M.A., Hu, J.-Y., Lafer-Sousa, R., Pulumo, R.T., Qu,  
464 J., Stoughton, C.M., Swanbeck, S.N., & Conway, B.R. Color-detection thresholds in rhesus  
465 macaque monkeys and humans. *J. Vis.* **14**, 12 (2014).
- 466 41. Derrington, A. M., Krauskopf, J. & Lenniet, P. Chromatic Mechanisms in Lateral Geniculate  
467 Nucleus of Macaque. *J. Physiol* **357**, 241–265 (1984).
- 468 42. Zhuang, J., Ng, L., Williams, D., Valley, M., Li, Y., Garrett, M., & Waters, J. An extended  
469 retinotopic map of mouse cortex. *Elife* **6**, (2017).
- 470 43. Garrett, M. E., Nauhaus, I., Marshel, J. H. & Callaway, E. M. Topography and areal organization  
471 of mouse visual cortex. *J. Neurosci.* **34**, 12587–12600 (2014).
- 472 44. Montijn, J. S., Olcese, U. & Pennartz, C. M. A. Visual Stimulus Detection Correlates with the  
473 Consistency of Temporal Sequences within Stereotyped Events of V1 Neuronal Population  
474 Activity. *J. Neurosci.* **36**, 8624–40 (2016).
- 475 45. Smirnakis, S. M., Berry li, M. J., Warland, D. K., Bialek, W. & Meister, M. Adaptation of retinal  
476 processing to image contrast and spatial scale. *Nature* **386**, 69–73 (1997).
- 477 46. Gao, E., Deangelis, G. C. & Burkhalter, A. Parallel Input Channels to Mouse Primary Visual  
478 Cortex. *J. Neurosci.* **30**, 5912–5926 (2010).
- 479 47. Piscopo, D. M., El-Danaf, R. N., Huberman, A. D. & Niell, C. M. Diverse visual features encoded  
480 in mouse lateral geniculate nucleus. *J. Neurosci.* **33**, 4642–4656 (2013).
- 481 48. Shapley, R. & Hawken, M. J. Color in the Cortex: single- and double-opponent cells. *Vision Res.*  
482 **51**, 701–717 (2011).
- 483 49. Febinger, H. Y., George, A., Priestley, J., Toth, L. A. & Opp, M. R. Effects of housing condition  
484 and cage change on characteristics of sleep in mice. *J. Am. Assoc. Lab. Anim. Sci.* **53**, 29–37  
485 (2014).
- 486 50. Spitschan, M., Aguirre, G. K., Brainard, D. H. & Sweeney, A. M. Variation of outdoor illumination  
487 as a function of solar elevation and light pollution. *Sci. Rep.* **6**, 26756 (2016).
- 488 51. Chiao, C.-C., Vorobyev, M., Cronin, T. W. & Osorio, D. Spectral tuning of dichromats to natural  
489 scenes. *Vision Res.* **40**, 3257–3271 (2000).
- 490 52. Teeters, J. L. *et al.* Neurodata Without Borders: Creating a Common Data Format for  
491 Neurophysiology. *Neuron* **88**, 629–634 (2015).
- 492 53. Contreras, D. & Palmer, L. Response to contrast of electrophysiologically defined cell classes in  
493 primary visual cortex. *J. Neurosci.* **23**, 6936–6945 (2003).
- 494
- 495



496 **Acknowledgements**

497 We would like to thank Saskia de Vries and Brian Long for useful discussions in the preparation of this  
498 manuscript. We would also like to thank the Neurosurgery and Behavior team, Animal Care team, and  
499 Naveen Oullette for assistance in animal surgery, care, and handling. We wish to thank the Allen  
500 Institute founders, Paul G Allen and Jody Allen, for their vision, encouragement and support.

501

502 **Contributions**

503 Conceptualization, DJD and RCR; Methodology, DO, SO; Investigation, DJD, JL, and SC; Software,  
504 DJD, DW, DO, and MB; Writing – Original Draft, DJD and RCR; Writing – Review and Editing, DJD, JL,  
505 DO, SC, DW, MB, SO, and RCR.

506
